# Supplementary material for: Examining changes in sleep duration associated with the onset of the COVID-19 pandemic: Who is sleeping and who is not?
Source: PubMed Central journal article supplement — medRxiv. 2021 Apr 8:2021.04.06.21254996. Preprint. [Version 1] doi: 10.1101/2021.04.06.21254996 (PMC8043471; doi:10.1101/2021.04.06.21254996), 2021-04-08
Supplement: NIHPP2021.04.06.21254996-supplement-1.pdf [file NIHPP2021.04.06.21254996-supplement-1.pdf]

## Supplement

### 1. Sex

- a. Female
- b. Male
- c. Other
- d. Prefer not to disclose

### 2. Age group

- a. 18-29 years old
- b. 30-39 years old
- c. 40-49 years old
- d. 50-59 years old
- e. 60-69 years old
- f. 70-79 years old
- g. 80+ years old

### 3. What's your race/ethnicity?

- a. Black, Non-Hispanic
- b. White, Non-Hispanic
- c. Asian/Pacific Islander
- d. Hispanic/Latinx
- e. Native American or American Indian
- f. Interracial, Mixed race, or Other

### 4. What is your marital or cohabitation status?

- a. Married/cohabitating
- b. Single
- c. Widowed
- d. Divorced/separated

### 5. How would you describe where you live?

- a. Urban
- b. Suburban
- c. Rural

### 6. What is your current working status?

- a. Employed, full time
- b. Employed, part time
- c. Unpaid work (e.g., homemaker, eldercare, childcare)
- d. Self-employed
- e. Out of work and looking for work
- f. Out of work but not currently looking for work
- g. Student
- h. Military personnel
- i. Retired

## Changes in Sleep with COVID-19

- j. Unable to work
7. What is your highest level of education?
- Less than a High School diploma
  - High School diploma or GED
  - Some college, no degree
  - Associate's degree
  - Bachelor's degree
  - Masters/Professional degree or above
8. In which state do you currently reside?  
[Drop-down menu of all 50 states, District of Columbia, Puerto Rico]
9. What do you think is your risk of getting infected with the Coronavirus?
- |                   |   |   |   |   |   |   |   |   |   |    |  |                  |
|-------------------|---|---|---|---|---|---|---|---|---|----|--|------------------|
| Not at all likely |   |   |   |   |   |   |   |   |   |    |  | Extremely likely |
| 0                 | 1 | 2 | 3 | 4 | 5 | 6 | 7 | 8 | 9 | 10 |  |                  |
10. If you were infected with the Coronavirus, how severe do you think it would be?
- |            |   |   |   |   |   |   |   |   |   |    |  |             |
|------------|---|---|---|---|---|---|---|---|---|----|--|-------------|
| Not Severe |   |   |   |   |   |   |   |   |   |    |  | Very Severe |
| 0          | 1 | 2 | 3 | 4 | 5 | 6 | 7 | 8 | 9 | 10 |  |             |
11. I can financially afford to self-quarantine.
- Strongly Agree
  - Agree
  - Disagree
  - Strongly Disagree
12. Since the Coronavirus outbreak, I feel discriminated against.
- Strongly Agree
  - Agree
  - Disagree
  - Strongly Disagree
13. Coronavirus is more deadly than the seasonal flu.
- Strongly Agree
  - Agree
  - Disagree
  - Strongly Disagree
14. Coronavirus is not as big of a problem as the media suggests.
- Strongly Agree
  - Agree
  - Disagree
  - Strongly Disagree

## Changes in Sleep with COVID-19

15. Coronavirus is a bigger problem than the government suggests.
- Strongly Agree
  - Agree
  - Disagree
  - Strongly Disagree

*In the last 3 months, how often have you felt:*

16. Left out
- Never
  - Rarely
  - Sometimes
  - Often
17. Isolated from others
- Never
  - Rarely
  - Sometimes
  - Often
18. That you lack companionship
- Never
  - Rarely
  - Sometimes
  - Often

*Over the last 7 days, how often have you been bothered by any of the following problems because of THE CORONAVIRUS OUTBREAK?*

19. Feeling nervous, anxious, or on edge?
- Not at all
  - Several days
  - More than half the days
  - Nearly everyday
20. Not being able to stop or control worrying?
- Not at all
  - Several days
  - More than half the days
  - Nearly everyday
21. Feeling down, depressed, or hopeless?
- Not at all
  - Several days
  - More than half the days
  - Nearly everyday

## Changes in Sleep with COVID-19

22. Little interest or pleasure in doing things (that I used to enjoy)?

- a. Not at all
- b. Several days
- c. More than half the days
- d. Nearly everyday

*Since hearing about the Coronavirus outbreak, how have the below behaviors changed for you?*

23. Sleeping

- a. Much more
- b. Little more
- c. Not changed
- d. Little less
- e. Much less
- f. Not applicable
